# Supplementary material for: Provider–Patient Communication and Involvement in Physical Activity Programs Among Patients Receiving Physical Therapy Services: A Qualitative Study
Source: PubMed Central journal article supplement — J Appl Gerontol. 2019 May 2;39(9):1000–7. doi: 10.1177/0733464819847402 (PMC7406963; doi:10.1177/0733464819847402), 2019-05-02
Supplement: Observation_protocol.pdf [file Observation_protocol.pdf]

**PT Observation Protocol**

TREATMENT

GYM

WAITING ROOM (circle one)

Location:

Date:

Observer:

Start Time: \_\_\_\_\_ End Time: \_\_\_\_\_

Visit #:

Page \_\_ of \_\_

*Descriptive Notes (5 minute increments)*

*Reflective Notes*



| <b>WAITING ROOM</b>                                   |                                                 |
|-------------------------------------------------------|-------------------------------------------------|
| <b>Physical Activity Resources – briefly describe</b> | <b># / Activities of Patients while waiting</b> |
| ___ Brochures            ___ # of persons viewing     | ___ Reading waiting room materials              |
| ___ Posters                ___ # of persons viewing   | ___ Using cell phone                            |
| ___ Other _____    ___ # of persons viewing           | ___ Talking with others                         |
| ___ Other _____    ___ # of persons viewing           | ___ Other: _____                                |
|                                                       | ___ Other: _____                                |
| <b><i>Sketch of Observation Area</i></b>              |                                                 |
| <b>Summary/Memo</b>                                   |                                                 |



## **PT Observations Protocol**

### **Ground rules**

- Focus on older adult patients.
- In gym, OK to focus on the patient from the Tx room and other older adult patients and staff.

### **OBSERVATION PROTOCOL (PINK SHEET)**

- Timeline/time-stamp
- Focus on both the patient and the PT
- Key quotes (“I’m older not old, there’s a difference”)
- Capture elements of Integrated Belief Model (self-efficacy, norms, attitudes, etc.)

#### **Descriptive Notes – describe what you see**

- Focus on what is happening (e.g. engagement, assessment, therapy, demonstration, practice, small talk, questions, etc.) and what is being discussed (balance, injury, goals, etc.)
- Barriers and facilitators that patient and PT identify to physical activity
- Capture how the discussion is happening (e.g. whether patient or PT brings up a topic, whether the PT uses close- or open-ended questions)

#### **Reflective Notes – reflect on what you are seeing**

- Non-verbals - How was the rapport between the PT and patient?
- Opportunities for PT-REFER study and other health promotion efforts (EF/physical activity, falls, depression, etc.)

### **ORANGE SHEET/TREATMENT ROOM SUMMARY**

- Capture what physical activity is being discussed (e.g. walking, gym, etc.)
- Include exercises at home (part of PT)- be specific if talking about HEP

#### **PA Summary (top of page)**

- PA resources discussed
- Take materials if you are allowed to

#### **Observation area (middle of page)**

- Include furniture and equipment, posters on the walls, brochures and magazines. Only have to make once if multiple observations. Note opportunities for PT-REFER/EF.
- Also indicate where people are in the area and things that you cannot see (e.g. music playing)

#### **Summary/memos (bottom of page)**

- Prepare immediately following the observation to capture key points
- Brief summary of visit
- Opportunities and barriers for physical activity
- Patient/provider communication
- Strong impression

### **WAITING ROOM**

- Number of patients and what activities patients are doing
- Take notes about feel and how people are using the space
